# Supplementary material for: Generalized synthesis of a family of multishelled metal oxide hollow microspheres
Source: Royal Society of Chemistry journal article supplement (doi:10.1039/c3ta00427a), 2013-01-01
Supplement: c3ta00427a.pdf [file c3ta00427a.pdf]

## Generalized Synthesis of the Family of Multishelled Metal Oxide

### Hollow Microspheres

Zhongping Tian,<sup>a,b</sup> Yong Zhou,<sup>\*a,b,d</sup> Zhengdao Li,<sup>a,c</sup> Qi Liu,<sup>a,c</sup> Zhigang Zou,<sup>\*a,b,c,d</sup>

<sup>a</sup> *Eco-Materials and Renewable Energy Research Center (ERERC),  
National Laboratory of Solid State Microstructures, Nanjing University, Nanjing  
210093, P. R. China. E-mail: [zhouyong1999@nju.edu.cn](mailto:zhouyong1999@nju.edu.cn)*

<sup>b</sup> *School of Physics, Nanjing University, Nanjing 210093, P. R. China.  
E-mail: [zgzou@nju.edu.cn](mailto:zgzou@nju.edu.cn)*

<sup>c</sup> *Department of Materials Science and Engineering, Nanjing University, Nanjing*

<sup>d</sup> *Kunshan Innovation Institute of Nanjing University, Kunshan 215300, P. R. China*

### Supporting Information

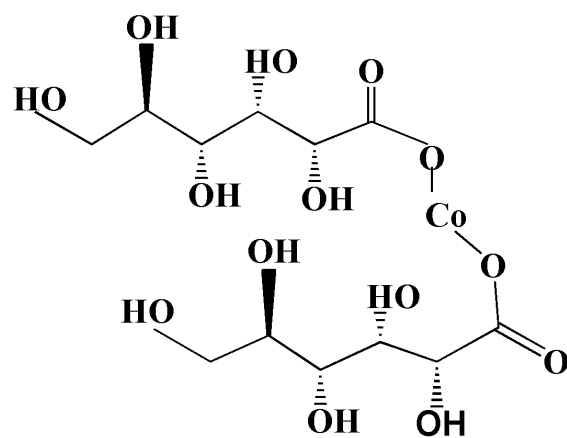

**Figure S1** Molecular structure of Co(II) gluconate.

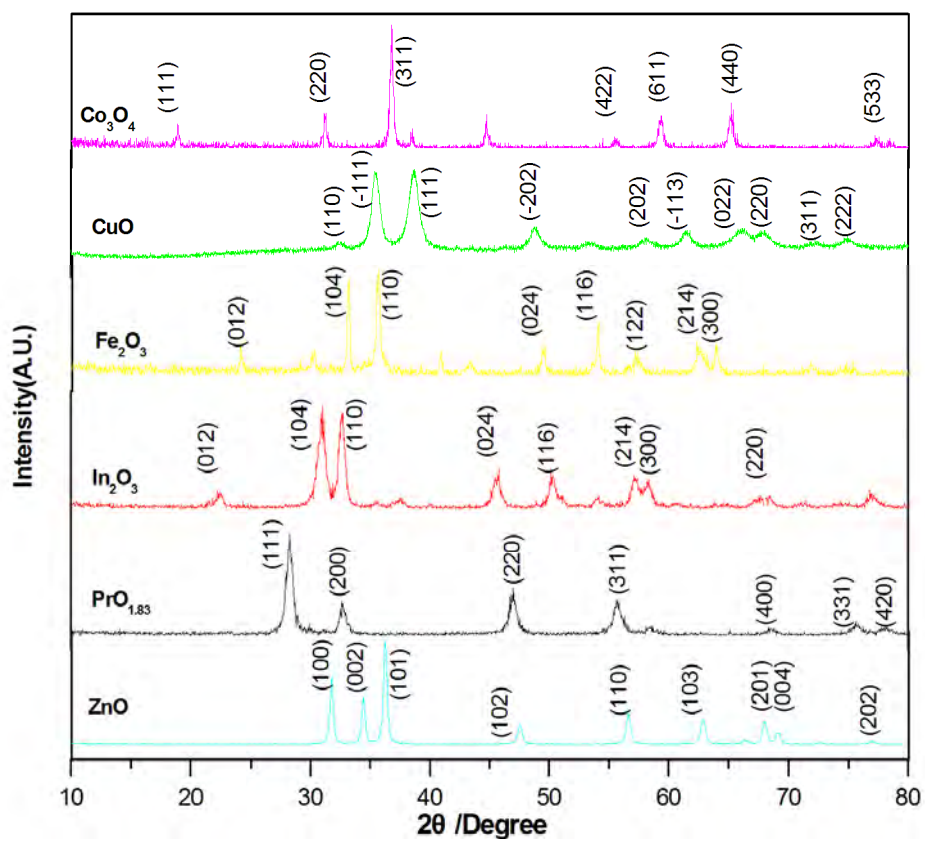

*Figure S2* XRD patterns of the various multishelled microspheres.

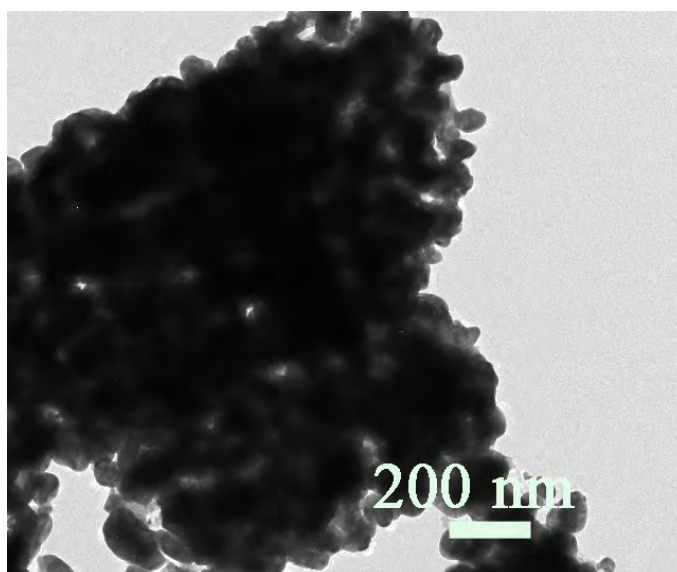

**Figure S3** TEM image of the carbon particle with hydrothermal treatment of cobalt(II) gluconate for 1 h.

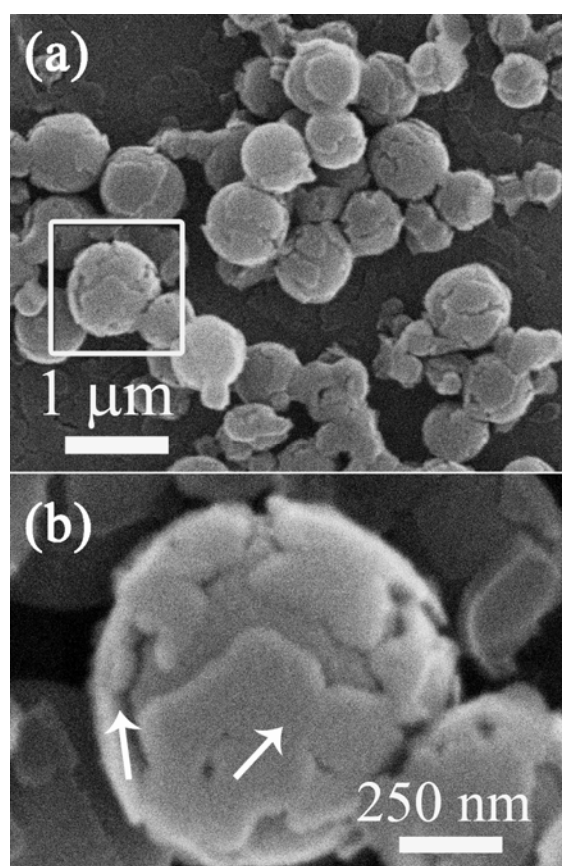

**Figure S4** SEM images of carbon microspheres with hydrothermal reaction of cobalt(II) gluconate for 4 h. (b) is the magnification of the selected area in (a).

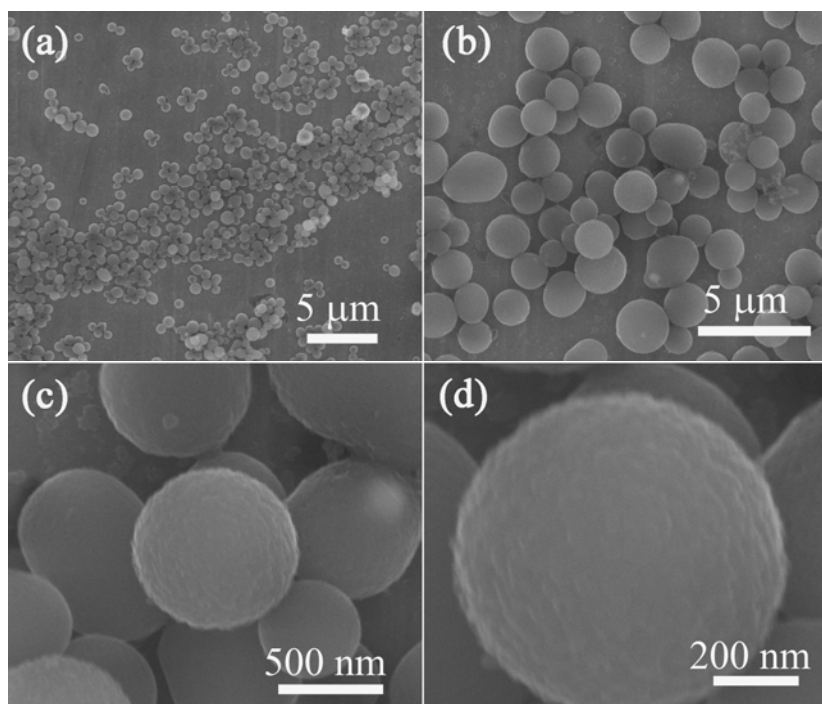

**Figure S5** FE-SEM images of spherical carbon obtained with hydrothermal treatment of cobalt(II) gluconate for 20 h at different magnification.

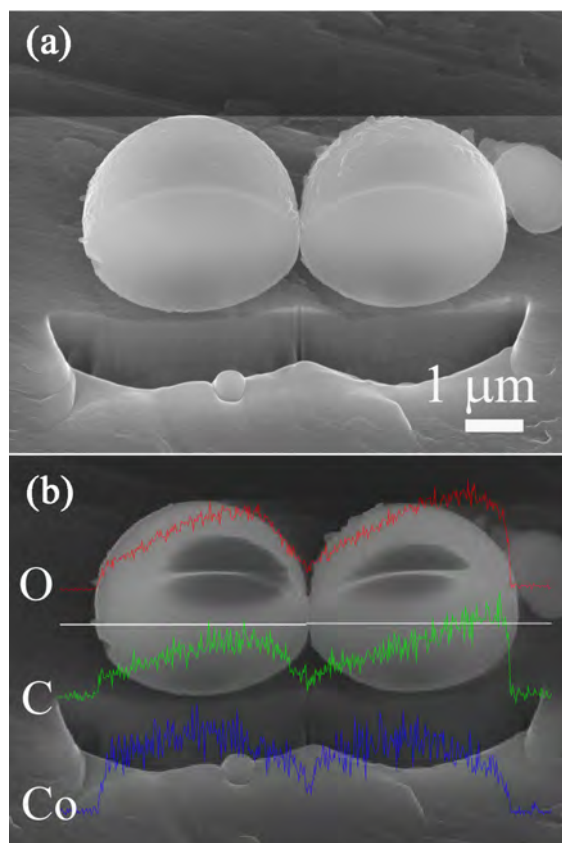

**Figure S6** SEM images of (a) two carbon microspheres after FIB cutting, (b) corresponding elemental mapping of the cross-section

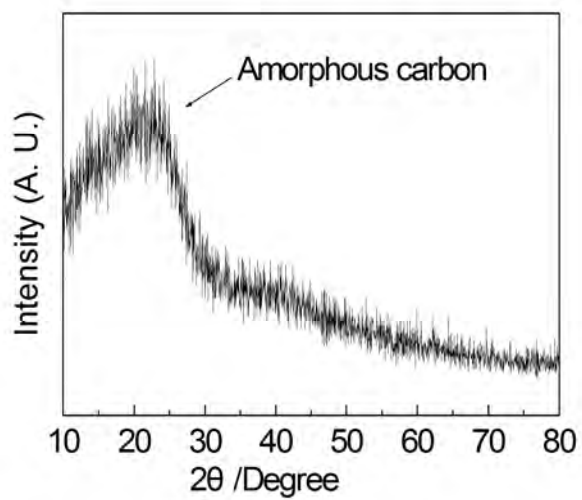

**Figure S7** XRD pattern of the as-prepared carbon sphere obtained with hydrothermal treatment of cobalt(II) gluconate for 20 h.



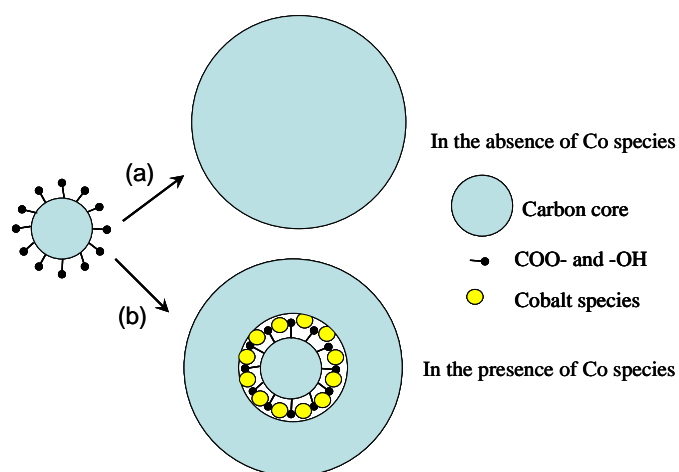

*Figure S8* Schematic illustration: (a) condensation of the cores to form the larger cores with carbonization process in the absence of Co species. (b) The existence of Co moiety may act as an interface to lead the newly carbonized reactant to growing as a new out layer of the existent carbon cores.

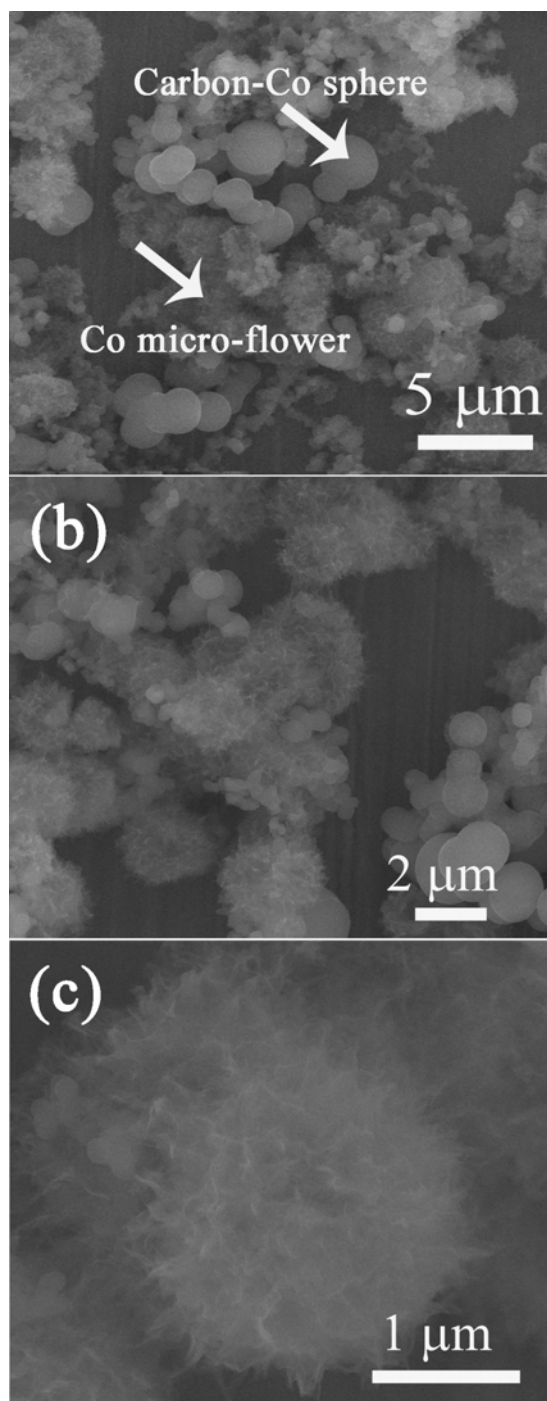

**Figure S9** FE-SEM images of the products formed at pH solution of 5.4 at different magnification. The arrowheads in (a) reveal the carbon spheres and microflower-like Co oxides, respectively. (b) and (c) shows the microflower-like Co oxides consisting of tiny nanowires as building blocks.
